# Supplementary material for: Study on soil hydraulic properties of slope farmlands with different degrees of erosion degradation in a typical black soil region
Source: PeerJ. 2023 Oct 5;11:e15930. doi: 10.7717/peerj.15930 (PMC10560494; doi:10.7717/peerj.15930)
Supplement: Supplemental Information 1 [file peerj-11-15930-s001.xlsx]

## Sheet: saturated hydraulic conductivit
Degree of erosion degradation	Soil depth (cm)	Saturated hydraulic conductivity(mm/min)
L1	0-10	0.1
L2	0-10	0.1
L3	0-10	0.13
M1	0-10	0.06
M2	0-10	0.07
M3	0-10	0.02
H1	0-10	0.03
H2	0-10	0.054
H3	0-10	0.036
L1	10-20	0.04
L2	10-20	0.06
L3	10-20	0.02
M1	10-20	0.02
M2	10-20	0.03
M3	10-20	0.01
H1	10-20	0.01
H2	10-20	0.005
H3	10-20	0.015

## Sheet: water characteristic curve
Soil water suction/kpa	L(0-10)Soil volume water content(cm3/cm3)	M(0-10)Soil volume water content(cm3/cm3)	H(0-10)Soil volume water content(cm3/cm3)
10	10.267	8.29624	6.599
20	8.67068	1.61968	2.27006
40	2.38232	1.53314	2.05889
60	1.51163	1.02621	1.53097
80	1.12465	0.77893	1.02944
100	0.95535	0.65529	0.89746
200	1.52372	1.13749	1.25381
400	1.30604	1.42186	1.35939
600	0.91907	0.82839	1.09543
800	0.82232	0.53165	1.63655
Degree of erosion degradation	Soil depth (cm)	<0.002(Clay)/%	0.002-0.02(Silt)/%	>0.02(Sand)/%	Soil bulk density/(g•cm-3)	θr/ (cm3•cm-3)	Mean value	Standard deviation	θs/ (cm3•cm-3)	Mean value	Standard deviation	α/ (cm-1)	Mean value	Standard deviation	n	Mean value	Standard deviation	m	Mean value	l	Ks	Mean value	Standard deviation	R2
L1	0-10	36.69	41.21	22.1		0.0963			0.5376			0.012			1.4395			0.3053		0.5	0.0388			0.993903
L2	0-10	38.3097	40.8276	20.8627		0.098			0.5423			0.0128			1.4235			0.2975		0.5	0.0389			0.993903
L3	0-10	36.0904	40.4226	23.487	1.0898	0.0955	0.0966	0.00104243	0.5352	0.538367	0.00294882	0.0119	0.0122333	0.000402768	1.4437	1.43557	0.008703	0.3073	0.303367	0.5	0.0388	0.0388333	4.71405e-05	0.993903
M1	0-10	36.444	34.5666	28.9894		0.092			0.4988			0.0127			1.4322			0.3018		0.5	0.0199			0.982915
M2	0-10	37.1962	34.2839	28.5199		0.093			0.5009			0.013			1.4264			0.2989		0.5	0.0203			0.982915
M3	0-10	37.4246	34.8694	27.706	1.21157	0.0932	0.0927333	0.000524934	0.5014	0.500367	0.00112645	0.0129	0.0128667	0.000124722	1.4255	1.42803	0.0029691	0.2985	0.299733	0.5	0.0202	0.0201333	0.000169967	0.982915
H1	0-10	33.6933	27.2583	39.0485		0.0849			0.4629			0.0143			1.4118			0.2917		0.5	0.0116			0.759415
H2	0-10	36.1953	28.5422	35.2625		0.088			0.4677			0.0143			1.4026			0.287		0.5	0.015			0.759415
H3	0-10	34.0298	30.6488	35.3214	1.31993	0.0857	0.0862	0.00131403	0.4628	0.464467	0.00228668	0.0131	0.0139	0.000565685	1.4258	1.4134	0.00953869	0.2986	0.292433	0.5	0.0109	0.0125	0.00179072	0.759415
L1	10-20	36.9593	40.1628	22.8779		0.0949			0.5197			0.0119			1.4405			0.3058		0.5	0.0277			0.993107
L2	10-20	35.0098	42.7336	22.2565		0.0931			0.5152			0.0108			1.4648			0.3173		0.5	0.0275			0.993107
L3	10-20	38.0578	39.7004	22.2418	1.1501	0.096	0.0946667	0.00119536	0.5226	0.519167	0.00304448	0.0125	0.0117333	0.000703957	1.4296	1.44497	0.0147133	0.3005	0.307867	0.5	0.0279	0.0277	0.000163299	0.993107
M1	10-20	37.363	34.1933	28.4438		0.0908			0.4787			0.0128			1.4207			0.2961		0.5	0.0129			0.822568
M2	10-20	37.5321	34.297	28.1709		0.091			0.4791			0.0128			1.4199			0.2957		0.5	0.0129			0.822568
M3	10-20	37.545	35.2097	27.2453	1.2851	0.0912	0.091	0.000163299	0.4793	0.479033	0.000249444	0.0126	0.0127333	9.42809e-05	1.423	1.4212	0.00131403	0.2973	0.296367	0.5	0.0128	0.0128667	4.71405e-05	0.822568
H1	10-20	36.4284	26.499	37.0725		0.0865			0.4548			0.0151			1.3823			0.2766		0.5	0.0092			0.705221
H2	10-20	33.39	27.49	39.12		0.083			0.449			0.0143			1.4046			0.2881		0.5	0.009			0.705221
H3	10-20	33.0234	31.4246	35.552	1.3683	0.083	0.0841667	0.00164992	0.4473	0.450367	0.00321075	0.0128	0.0140667	0.000953357	1.4267	1.40453	0.0181263	0.2991	0.287933	0.5	0.0083	0.00883333	0.000385861	0.705221
					θr
		Number		N	Subset					Degree of erosion degradation	Soil depth /cm	θr/ (cm3·cm-3)	θs/ (cm3·cm-3)	α/ (cm-1)	n	Ks / (cm·d-1)	R2
					1	2	3	4		L	0~10	0.0966±0.0010a	0.5384±0.0029a	0.0122±0.0004c	1.4356±0.0087ab	0.0388±0.0000a	0.9939
		Duncana,b	6	3	0.0841667						10~20	0.0947±0.0012ab	0.5192±0.0030b	0.0117±0.0007c	1.445±0.0147a	0.0277±0.0002b	0.9931
			3	3	0.0862					M	0~10	0.0927±0.0005bc	0.5004±0.0011c	0.0129±0.0001abc	1.428±0.0030abc	0.0201±0.0002c	0.9829
			5	3		0.091					10~20	0.091±0.0002c	0.479±0.0002d	0.0127±0.0001bc	1.4212±0.0013abc	0.0129±0.0000d	0.8226
			2	3		0.0927333	0.0927333			H	0~10	0.0862±0.0013d	0.4645±0.0023e	0.0139±0.0006ab	1.4134±0.0095bc	0.0125±0.0018d	0.7594
			4	3			0.0946667	0.0946667			10~20	0.0842±0.0016d	0.4504±0.0032f	0.0141±0.0010a	1.4045±0.0181c	0.0088±0.0004e	0.7053
			1	3				0.0966
			Significance		0.0894424	0.141231	0.104418	0.104418
		It shows the mean of the group in the same proton concentration. According to the average observed. The error item is the sum of mean squares (error)= 1.817E-6.
		a. Use harmoniUse harmonic mean sample size=3.000.
		b. Alpha = .05。
		θs
		Number		N	Subset
					1	2	3	4	5	6
		Duncana,b	6	3	0.450367
			3	3		0.464467
			5	3			0.479033
			2	3				0.500367
			4	3					0.519167
			1	3						0.538367
			Significance		1	1	1	1	1	1
		It shows the mean of the group in the same proton concentration. According to the average observed. The error item is the sum of mean squares (error)= 8.708E-6。
		a. Use harmoniUse harmonic mean sample size=3.000.
		b. Alpha = .05。
		α
		Number		N	Subset
					1	2	3
		Duncana,b	4	3	0.0117333
			1	3	0.0122333
			5	3	0.0127333	0.0127333
			2	3	0.0128667	0.0128667	0.0128667
			3	3		0.0139	0.0139
			6	3			0.0140667
			Significance		0.0867387	0.0719615	0.0651262
		It shows the mean of the group in the same proton concentration. According to the average observed. The error item is the sum of mean squares (error)= 4.778E-7。
		a. Use harmoniUse harmonic mean sample size=3.000.
		b. Alpha = .05。
		n
		Number		N	Subset
					1	2	3
		Duncana,b	6	3	1.40453
			3	3	1.4134	1.4134
			5	3	1.4212	1.4212	1.4212
			2	3	1.42803	1.42803	1.42803
			1	3		1.43557	1.43557
			4	3			1.44497
			Significance		0.0697871	0.085055	0.067052
		It shows the mean of the group in the same proton concentration. According to the average observed. The error item is the sum of mean squares (error)= .000。
		a. Use harmoniUse harmonic mean sample size=3.000.
		b. Alpha = .05。
		ks
		Number		N	Subset
					1	2	3	4	5
		Duncana,b	6	3	0.00883333
			3	3		0.0125
			5	3		0.0128667
			2	3			0.0201333
			4	3				0.0277
			1	3					0.0388333
			Significance		1	0.635736	1	1	1
		It shows the mean of the group in the same proton concentration. According to the average observed. The error item is the sum of mean squares (error)= 8.539E-7。
		a. Use harmoniUse harmonic mean sample size=3.000.
		b. Alpha = .05。

## Sheet: SpecSpecific water capacity
Degree of erosion degradation	Soil depth (cm)	SpecSpecific water capacity/(cm3•(cm3•kpa)-1)
L1	0-10	0.00079
L2	0-10	0.0009
L3	0-10	0.00086	0.00085
M1	0-10	0.0008
M2	0-10	0.00078
M3	0-10	0.00079	0.00079
H1	0-10	0.00072
H2	0-10	0.0007
H3	0-10	0.00077	0.00073
L1	10-20	0.0008
L2	10-20	0.00083
L3	10-20	0.00083	0.00082
M1	10-20	0.00072
M2	10-20	0.00072
M3	10-20	0.00075	0.00073
H1	10-20	0.00068
H2	10-20	0.00073
H3	10-20	0.00066	0.00069

## Sheet: basic physical properties
Degree of erosion degradation	Soil depth (cm)	<0.002(Clay)/%	Mean value	Standard deviation	0.002-0.02(Silt)/%	Mean value	Standard deviation	>0.02(Sand)/%	Mean value	Standard deviation	Soil bulk density/(g/cm3)	Mean value	Standard deviation	Organic matter content /(g•kg-1)	Mean value	Standard deviation	>0.25mm water-stable aggregates/%	Mean value	Standard deviation	TN/(g•kg-1)	Mean value	Standard deviation	OP/(mg•kg-1)	Mean value	Standard deviation	AK/(mg•kg-1)	Mean value	Standard deviation
L1	0-10	36.69			41.21			22.1			0.963			4.81			78.586			1.121			51.315			271.125
L2	0-10	38.3097			40.8276			20.8627			1.2093			3.15			82.07			1.003			43.9875			269.098
L3	0-10	36.0904	37.03	0.937373	40.4226	40.8201	0.321483	23.487	22.1499	1.07193	1.0971	1.0898	0.100684	3.17	3.71	0.77786	82.21	80.9553	1.67635	0.933	1.019	0.0775801	61.6075	52.3033	7.2272	281.071	273.765	5.23221
M1	0-10	36.444			34.5666			28.9894			1.0537			3.13			79.876			0.925			43.132			251.068
M2	0-10	37.1962			34.2839			28.5199			1.3446			3.37			76.462			0.913			40.198			241.652
M3	0-10	37.4246	37.0216	0.418949	34.8694	34.5733	0.239062	27.706	28.4051	0.530213	1.2364	1.21157	0.120051	3.54	3.34667	0.168193	79.732	78.69	1.57653	0.91	0.916	0.00648074	39.21	40.8467	1.66555	254.007	248.909	5.26988
H1	0-10	33.6933			27.2583			39.0485			1.35			2.53			73.654			0.801			29.017			229.009
H2	0-10	36.1953			28.5422			35.2625			1.29			2.8			74.24			0.792			25.658			237.098
H3	0-10	34.0298	34.6395	1.10869	30.6488	28.8164	1.39771	35.3214	36.5441	1.77101	1.3198	1.31993	0.0244951	2.67	2.66667	0.110252	72.714	73.536	0.62855	0.828	0.807	0.0152971	33.118	29.2643	3.05055	214.89	226.999	9.17711
L1	10-20	36.9593			40.1628			22.8779			1.1503			3.29			84.846			0.832			44.675			255.998
L2	10-20	35.0098			42.7336			22.2565			1.1			3.24			83.856			0.708			49.85			248.022
L3	10-20	38.0578	36.6756	1.26038	39.7004	40.8656	1.3343	22.2418	22.4588	0.296468	1.2	1.1501	0.0408251	3.11	3.21333	0.0758654	85.868	84.8567	0.82143	0.617	0.719	0.0881173	49.03	47.8517	2.27105	261.1	255.04	5.38187
M1	10-20	37.363			34.1933			28.4438			1.3143			3.11			80.362			0.841			39.012			231.47
M2	10-20	37.5321			34.297			28.1709			1.2347			3.55			80.264			0.876			32.86			233.467
M3	10-20	37.545	37.48	0.0829366	35.2097	34.5667	0.456671	27.2453	27.9533	0.512884	1.3063	1.2851	0.0357875	2.87	3.17667	0.281583	80.872	80.4993	0.266535	0.791	0.836	0.0348807	35.223	35.6983	2.53393	229.908	231.615	1.45657
H1	10-20	36.4284			26.499			37.0725			1.3196			2.53			77.692			0.713			23.018			224.089
H2	10-20	33.39			27.49			39.12			1.3653			2.59			72.568			0.692			19.008			219.048
H3	10-20	33.0234	34.2806	1.52611	31.4246	28.4712	2.12721	35.552	37.2482	1.46193	1.42	1.3683	0.041043	2.47	2.53	0.0489898	76.638	75.6327	2.20935	0.704	0.703	0.00860233	22.547	21.5243	1.78968	213.012	218.716	4.52824
Degree of erosion degradation	Soil depth (cm)	Clay	Duncan	Standard deviation	Sand	Duncan	Standard deviation	Silt	Duncan	Standard deviation	>0.25mm water-stable aggregates/%	Standard deviation	Duncan	TN/(g•kg-1)	Standard deviation	Duncan	OP/(mg•kg-1)	Standard deviation	Duncan	AK/(mg•kg-1)	Standard deviation	Duncan
L	0-10	37.03	a	0.94	22.14	c	1.07	40.82	a	0.23	80.9553	1.67635	b	1.019	0.08	a	52.303	7.23	a	273.765	5.23	a
M	0-10	37.02	a	0.42	28.41	b	0.53	34.57	b	0.24	78.69	1.57653	b	0.916	0.01	ab	40.847	1.67	bc	248.909	5.27	b
H	0-10	34.64	bc	1.11	36.54	a	1.77	28.82	c	1.4	73.536	0.62855	c	0.807	0.02	bc	29.264	3.05	de	226.999	9.18	cd
L	10-20	36.68	ab	1.26	22.46	c	0.3	40.87	a	1.33	84.8567	0.82143	a	0.719	0.09	c	47.852	2.27	ab	255.04	5.38	b
M	10-20	37.48	a	0.08	27.95	b	0.51	34.57	b	0.46	80.4993	0.266535	b	0.836	0.03	b	35.698	2.53	cd	231.615	1.46	c
H	10-20	34.28	c	1.53	37.24	a	1.46	28.47	c	2.13	75.6327	2.20935	c	0.703	0.01	c	21.524	1.79	e	218.716	4.53	d
Degree of erosion degradation	Soil depth (cm)	Soil bulk density/(g/cm3)	Duncan	Standard deviation	Organic matter content /(g•kg-1)	Duncan	Standard deviation		Degree of erosion degradation	Soil depth/cm	Organic matter content /(g•kg-1)	Soil bulk density/(g/cm3)	Sand/%	Silt/%	Clay/%	>0.25mm water-stable aggregates/%	TN/(g•kg-1)	OP/(mg•kg-1)	AK/(mg•kg-1)
L	0-10	1.09	c	0.1	3.71	a	0.78		L	0~10	3.71±0.78a	1.09±0.1c	22.14±1.07c	40.82±0.23a	37.03±0.94a	80.96±1.68b	1.019±0.08a	52.303±7.23a	273.765±5.23a
M	0-10	1.21	abc	0.12	3.35	ab	0.17			10~20	3.21±0.08ab	1.15±0.04bc	22.46±0.3c	40.87±1.33a	36.68±1.26ab	84.86±0.82a	0.719±0.09c	47.852±2.27ab	255.040±5.38b
H	0-10	1.32	a	0.02	2.67	b	0.11		M	0~10	3.35±0.17ab	1.21±0.12abc	28.41±0.53b	34.57±0.24b	37.02±0.42a	78.69±1.58b	0.916±0.01a	40.847±1.67bc	248.909±5.27b
L	10-20	1.15	bc	0.04	3.21	ab	0.08			10~20	3.18±0.28ab	1.29±0.04ab	27.95±0.51b	34.57±0.46b	37.48±0.08a	80.50±0.27b	0.836±0.03b	35.698±2.53cd	231.615±1.46c
M	10-20	1.29	ab	0.04	3.18	ab	0.28		H	0~10	2.67±0.11b	1.32±0.02a	36.54±1.77a	28.82±1.4c	34.64±1.11bc	73.54±0.63c	0.807±0.02bc	29.264±3.05de	226.999±9.18cd
H	10-20	1.37	a	0.04	2.53	c	0.05			10~20	2.53±0.05c	1.37±0.04a	37.24±1.46a	28.47±2.13c	34.28±1.53c	75.63±2.21c	0.703±0.01c	21.524±1.79e	218.716±4.53d
Soil bulk density
Number		N	Subset					Organic matter content							TN							OP									AK
			1	2	3			Number		N	Subset				Number		N	Subset				Number		N	Subset						Number		N	Subset
Duncana,b	1.00	3	1.09								1	2						1	2	3					1	2	3	4	5					1	2	3	4
	4.00	3	1.15	1.15				Duncana,b	6.00	3	2.53				Duncana,b	6	3	0.703				Duncana,b	6	3	21.5243						Duncana,b	6	3	218.716
	2.00	3	1.21	1.21	1.21				3.00	3	2.66667					4	3	0.719					3	3	29.2643	29.2643						3	3	226.999	226.999
	5.00	3		1.28333	1.28333				5.00	3	3.17667	3.17667				3	3	0.807	0.807				5	3		35.6983	35.6983					5	3		231.615
	3.00	3			1.32				4.00	3	3.21333	3.21333				5	3		0.836				2	3			40.8467	40.8467				2	3			248.909
	6.00	3			1.37				2.00	3	3.34667	3.34667				2	3		0.916	0.916			4	3				47.8517	47.8517			4	3			255.04
	Significance		0.133436	0.098724	0.058165				1.00	3		3.71				1	3			1.019			1	3					52.3037			1	3				273.765
It shows the mean of the group in the same proton concentration. According to the average observed. The error item is the sum of mean squares (error)= .008。									Significance		0.0539717	0.182277				Significance		0.0733095	0.0620199	0.0644006			Significance		0.0543812	0.101746	0.181639	0.0776689	0.243645			Significance		0.167776	0.429178	0.298486	1
a. Use harmoniUse harmonic mean sample size=3.000.								It shows the mean of the group in the same proton concentration. According to the average observed. The error item is the sum of mean squares (error)= .183。							It shows the mean of the group in the same proton concentration. According to the average observed. The error item is the sum of mean squares (error)= .183。							It shows the mean of the group in the same proton concentration. According to the average observed. The error item is the sum of mean squares (error)= 19.774。									It shows the mean of the group in the same proton concentration. According to the average observed. The error item is the sum of mean squares (error)= 47.740。
b. Alpha = .05。								a. Use harmoniUse harmonic mean sample size=3.000.							a. Use harmoniUse harmonic mean sample size=3.000.							a. Use harmoniUse harmonic mean sample size=3.000.									a. Use harmoniUse harmonic mean sample size=3.000.
								b. Alpha = .05。							b. Alpha = .05。							b. Alpha = .05。									b. Alpha = .05。
Clay								>0.25mm water-stable aggregates
Number		N	Subset					Number		N	Subset
			1	2	3						1	2	3
Duncana,b	6.00	3	34.28					Duncana,b	3	3	73.5333
	3.00	3	34.64	34.64					6	3	75.6333
	4.00	3		36.6767	36.6767				2	3		78.69
	2.00	3			37.02				5	3		80.4967
	1.00	3			37.03				1	3		80.9567
	5.00	3			37.4767				4	3			84.86
	Significance		0.729852	0.0686736	0.480251				Significance		0.152077	0.141661	1
It shows the mean of the group in the same proton concentration. According to the average observed. The error item is the sum of mean squares (error)= 1.556。								It shows the mean of the group in the same proton concentration. According to the average observed. The error item is the sum of mean squares (error)= .183。
a. Use harmoniUse harmonic mean sample size=3.000.								a. Use harmoniUse harmonic mean sample size=3.000.
b. Alpha = .05。								b. Alpha = .05。
Silt
Number		N	Subset
			1	2	3
Duncana,b	6.00	3	28.47
	3.00	3	28.8167
	5.00	3		34.5667
	2.00	3		34.5733
	1.00	3			40.82
	4.00	3			40.8633
	Significance		0.777305	0.995653	0.97175
It shows the mean of the group in the same proton concentration. According to the average observed. The error item is the sum of mean squares (error)= 2.154。
a. Use harmoniUse harmonic mean sample size=3.000.
b. Alpha = .05。
Sand
Number		N	Subset
			1	2	3
Duncana,b	1.00	3	22.15
	4.00	3	22.46
	5.00	3		27.9533
	2.00	3		28.4067
	3.00	3			36.5433
	6.00	3			37.2467
	Significance		0.779969	0.683459	0.529043
It shows the mean of the group in the same proton concentration. According to the average observed. The error item is the sum of mean squares (error)= 1.766。
a. Use harmoniUse harmonic mean sample size=3.000.
b. Alpha = .05。

## Sheet: Correlation analysis
							correlation
									Organic matter content	Soil bulk density	C(100)	Ks	Sand	Silt	Clay	α	n	>0.25mm water-stable aggregates
							Organic matter content	Pearson	1	-.908*	.904*	0.78571	-.907*	.873*	.877*	-.820*	0.796772	0.697154
								Significance (two-tailed)		0.0121813	0.0132714	0.0639603	0.0124827	0.0232696	0.0215904	0.0455021	0.0577556	0.123685
								N	6	6	6	6	6	6	6	6	6	6
							Soil bulk density	Pearson	-.908*	1	-.997**	-.834*	.926**	-.944**	-0.687079	.874*	-.920**	-0.74799
								Significance (two-tailed)	0.0121813		1.12957e-05	0.0391376	0.00791255	0.00467491	0.131559	0.0228376	0.00940064	0.0872608
								N	6	6	6	6	6	6	6	6	6	6
							C(100)	Pearson	.904*	-.997**	1	.832*	-.916*	.931**	0.689453	-.868*	.926**	0.73061
								Significance (two-tailed)	0.0132714	1.12957e-05		0.040066	0.010169	0.00695744	0.129685	0.024807	0.00790983	0.0990815
								N	6	6	6	6	6	6	6	6	6	6
							Ks	Pearson	0.78571	-.834*	.832*	1	-0.621311	0.644669	0.411406	-0.494975	0.569571	0.291945
								Significance (two-tailed)	0.0639603	0.0391376	0.040066		0.187955	0.166958	0.417708	0.318173	0.238031	0.574525
Water characteristic parameter	Physicochemical properties of soil							N	6	6	6	6	6	6	6	6	6	6
	Organic matter content	Soil bulk density	Sand	Silt	Clay	>0.25mm water-stable aggregates	Sand	Pearson	-.907*	.926**	-.916*	-0.621311	1	-.991**	-.851*	.981**	-.943**	-.922**
α	-0.820*	0.874*	0.981**	-0.976**	-0.822*	-0.962**		Significance (two-tailed)	0.0124827	0.00791255	0.010169	0.187955		0.00011281	0.0316635	0.00052272	0.00479694	0.00895361
n	0.797	-0.920**	-0.943**	0.954**	0.727	0.887*		N	6	6	6	6	6	6	6	6	6	6
C(100)	0.904*	-0.997**	-0.916*	0.931**	0.689	0.731	Silt	Pearson	.873*	-.944**	.931**	0.644669	-.991**	1	0.774503	-.976**	.954**	.918**
Ks	0.786	-0.834*	-0.621	0.645	0.411	0.292		Significance (two-tailed)	0.0232696	0.00467491	0.00695744	0.166958	0.00011281		0.0705401	0.000836131	0.00315009	0.00973642
								N	6	6	6	6	6	6	6	6	6	6
							Clay	Pearson	.877*	-0.687079	0.689453	0.411406	-.851*	0.774503	1	-.822*	0.727419	0.767016
								Significance (two-tailed)	0.0215904	0.131559	0.129685	0.417708	0.0316635	0.0705401		0.0448048	0.101324	0.0750993
								N	6	6	6	6	6	6	6	6	6	6
							α	Pearson	-.820*	.874*	-.868*	-0.494975	.981**	-.976**	-.822*	1	-.964**	-.962**
								Significance (two-tailed)	0.0455021	0.0228376	0.024807	0.318173	0.00052272	0.000836131	0.0448048		0.00191034	0.00215673
								N	6	6	6	6	6	6	6	6	6	6
							n	Pearson	0.796772	-.920**	.926**	0.569571	-.943**	.954**	0.727419	-.964**	1	.887*
								Significance (two-tailed)	0.0577556	0.00940064	0.00790983	0.238031	0.00479694	0.00315009	0.101324	0.00191034		0.018339
								N	6	6	6	6	6	6	6	6	6	6
							>0.25mm water-stable aggregates	Pearson	0.697154	-0.74799	0.73061	0.291945	-.922**	.918**	0.767016	-.962**	.887*	1
								Significance (two-tailed)	0.123685	0.0872608	0.0990815	0.574525	0.00895361	0.00973642	0.0750993	0.00215673	0.018339
								N	6	6	6	6	6	6	6	6	6	6
							* Indicates a significant correlation at the 0.05 level (bilateral).
							** Indicates a very significant correlation at the 0.01 level (bilateral).

## Sheet: Basic information of samplings
Table 1 Basic information of sampling sites
Erosion degradation degree	Plot location	Slope degree/(°)	Soil depth/cm	Corn yield/(kg•ha-1)	Soil loss speeda/(mm•a-1)	Erosion modulusb/(t•km-2•a-1)
Lightly(L)	Longquan village	3.4	43	12000	2.51	3003
Moderately(M)	Jiahuangtun village	6.2	27	10500	4.58	5480
Heavily(H)	Shuangyong Road	10.6	18	8250	7.83	9368
a Soil loss equation of black soil cultivated land A=0.739*slop, where the unit of A is mm•a-1 and that of slope is °. b Soil erosion modulus converted from soil bulk density of 1.2g•cm-3. Technical Standard for Comprehensive Control of Soil Erosion in Black Soil Area (SL446-2009) https://www.doc88.com/p-7919531360175.html
